# Supplementary material for: Second generation gold nanobeacons for robust K-edge imaging with multi-energy CT
Source: Royal Society of Chemistry journal article supplement (doi:10.1039/c2jm35334b), 2012-01-01
Supplement: c2jm35334b.pdf [file c2jm35334b.pdf]

## Supporting Information for

# **Second Generation Gold Nanobeacons for Robust K-Edge Imaging with Multi-Energy CT**

*Carsten O. Schirra,<sup>1</sup> Angana Senpan,<sup>2</sup> Ewald Roessl,<sup>3</sup> Axel Thran,<sup>3</sup> Allen J. Stacy,<sup>2</sup> Lina Wu,<sup>2,4</sup> Roland Proska<sup>3</sup> and Dipanjan Pan<sup>2</sup>*

*<sup>1</sup>C-TRAIN and Division of Cardiology, Washington University School of Medicine, 4320 Forest Park Avenue, Saint Louis, MO 63108; <sup>2</sup>Philips Research North America, 345 Scarborough Road, Briarcliff Manor, NY 10510, USA; <sup>3</sup>Philips Research Laboratories, Innovative Technologies, Röntgenstraße 24-26, D-22335 Hamburg, Germany*

*AUTHOR EMAIL ADDRESS: [dipanjan@wustl.edu](mailto:dipanjan@wustl.edu)*

**Keywords:** Multi-energy CT, K-edge imaging; gold nanobeacons; spectral CT; thrombus; sentinel lymphnode imaging; pre-targeting

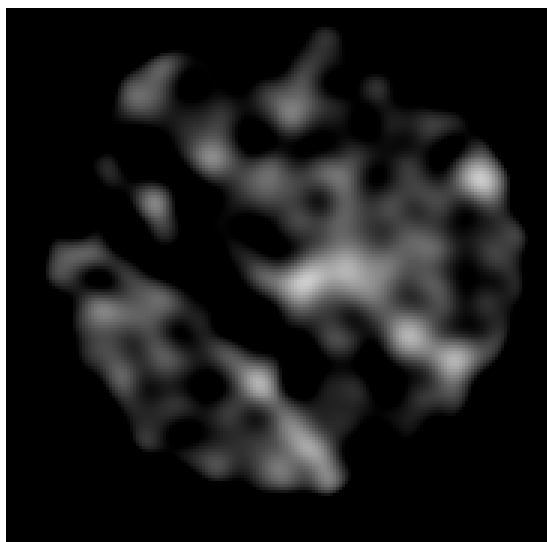

**Figure 1S:** *In vitro* targeting with GNB<sub>1</sub>: A representative spectral CT images of human plasma clot treated with GNB<sub>1</sub>, which resulted in a poor SNR and is impossible to distinguish from the surrounding water.

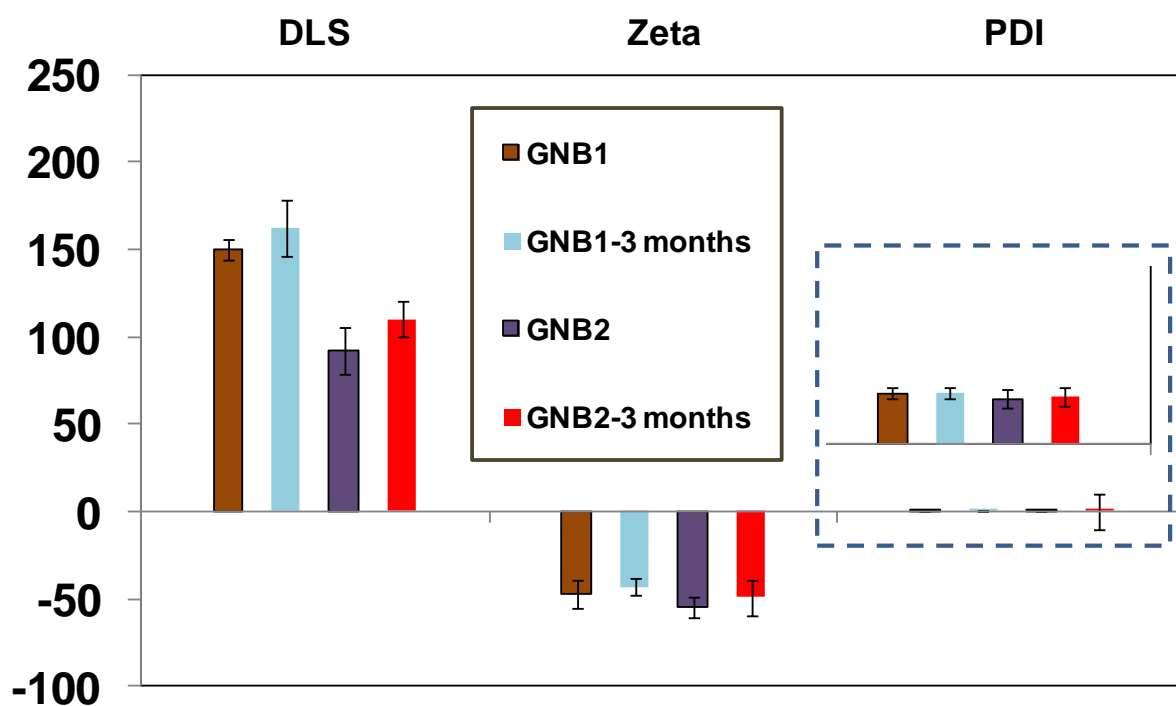

**Figure 2S:** Stability data showing the variation of hydrodynamic diameter, zeta potential and polydispersity values of GNB<sub>1</sub> and GNB<sub>2</sub> over three months period.
